# Supplementary material
Source: publisher figshare collection journal article supplement (https://tandf.figshare.com/ndownloader/files/22797212)
Supplement: Supplementary file 1 [file 22797212]

**Supplementary Table 3**: Fitted linear quantile regression coefficients for mean uterine artery PI

| Parameter | Value | Std. Error | t value | p≤ |
| --- | --- | --- | --- | --- |
|  |  | **5th percentile** | |  |
| intercept | 0.707 | 0.052 | 13.521 | 0.0001 |
| β1 (ga) | -0.006 | 0.002 | -4.132 | 0.0001 |
|  |  |  |  |  |
|  |  | **10th centile** |  |  |
| intercept | 0.759 | 0.044 | 17.333 | 0.0001 |
| β1 (ga) | -0.007 | 0.001 | -5.512 | 0.0001 |
|  |  |  |  |  |
|  |  | **50th centile** |  |  |
| intercept | 1.042 | 0.042 | 24.758 | 0.0001 |
| β1 (ga) | -0.010 | 0.001 | -7.602 | 0.0001 |
|  |  |  |  |  |
|  |  | **90th centile** |  |  |
| intercept | 1.696 | 0.075 | 22.745 | 0.0001 |
| β1 (ga) | -0.020 | 0.002 | -8.615 | 0.0001 |
|  |  |  |  |  |
|  |  | **95th centile** |  |  |
| intercept | 1.748 | 0.109 | 16.102 | 0.0001 |
| β1 (ga) | -0.020 | 0.003 | -6.332 | 0.0001 |

**Supplementary Table 4**: Fitted linear quantile regression coefficients for umbilical artery PI

| Parameter | Value | Std. Error | t value | p≤ |
| --- | --- | --- | --- | --- |
|  |  | **5th centile** |  |  |
| intercept | 1.365 | 0.051 | 26.802 | 0.0001 |
| β1 (ga) | -0.021 | 0.002 | -13.071 | 0.0001 |
|  |  |  |  |  |
|  |  | **10th centile** |  |  |
| intercept | 1.363 | 0.046 | 29.911 | 0.0001 |
| β1 (ga) | -0.020 | 0.001 | -13.711 | 0.0001 |
|  |  |  |  |  |
|  |  | **50th centile** |  |  |
| intercept | 1.625 | 0.039 | 41.984 | 0.0001 |
| β1 (ga) | -0.020 | 0.001 | -17.235 | 0.0001 |
|  |  |  |  |  |
|  |  | **90th centile** |  |  |
| intercept | 2.072 | 0.057 | 36.395 | 0.0001 |
| β1 (ga) | -0.027 | 0.002 | -15.887 | 0.0001 |
|  |  |  |  |  |
|  |  | **95th centile** |  |  |
| intercept | 2.122 | 0.048 | 43.928 | 0.0001 |
| β1 (ga) | -0.027 | 0.001 | -19.003 | 0.0001 |

**Supplementary Table 5**: Fitted linear quantile regression coefficients for middle cerebral artery PI

| Parameter | Value | Std. Error | t value | p≤ |
| --- | --- | --- | --- | --- |
|  |  | **5th centile** | |  |
| intercept | -1.608 | 0.626 | -2.568 | 0.0001 |
| β1 (ga) | 0.233 | 0.039 | 5.938 | 0.0001 |
| β2 (ga)2 | -0.004 | 0.001 | -6.806 | 0.0001 |
|  |  |  |  |  |
|  |  | **10th centile** | |  |
| intercept | -1.321 | 0.432 | -3.056 | 0.0001 |
| β1 (ga) | 0.216 | 0.028 | 7.734 | 0.0001 |
| β2 (ga)2 | -0.004 | 0.001 | -8.686 | 0.0001 |
|  |  |  |  |  |
|  |  | **50th centile** | |  |
| intercept | -2.141 | 0.408 | -5.252 | 0.0001 |
| β1 (ga) | 0.285 | 0.026 | 10.899 | 0.0001 |
| β2 (ga)2 | -0.005 | 0.001 | -11.891 | 0.0001 |
|  |  |  |  |  |
|  |  | **90th centile** | |  |
| intercept | -2.910 | 0.875 | -3.327 | 0.0001 |
| β1 (ga) | 0.377 | 0.053 | 7.086 | 0.0001 |
| β2 (ga)2 | -0.007 | 0.001 | -8.106 | 0.0001 |
|  |  |  |  |  |
|  |  | **95th centile** | |  |
| intercept | -3.627 | 1.066 | -3.402 | 0.0001 |
| β1 (ga) | 0.427 | 0.066 | 6.456 | 0.0001 |
| β2 (ga)2 | -0.007 | 0.001 | -7.194 | 0.0001 |

**Supplementary Table 6**: Fitted linear quantile regression coefficients for cerebro-placental ratio.

| Parameter | Value | Std. Error | t value | p≤ |
| --- | --- | --- | --- | --- |
|  |  | **5thpercentile** | |  |
| intercept | -2.867 | 0.593 | -4.835 | 0.0001 |
| β1 (ga) | 0.265 | 0.038 | 7.024 | 0.0001 |
| β2 (ga)2 | -0.004 | 0.001 | -6.769 | 0.0001 |
|  |  |  |  |  |
|  |  | **10th centile** | |  |
| intercept | -2.408 | 0.755 | -3.189 | 0.0001 |
| β1 (ga) | 0.240 | 0.047 | 5.096 | 0.0001 |
| β2 (ga)2 | -0.004 | 0.001 | -4.974 | 0.0001 |
|  |  |  |  |  |
|  |  | **50th centile** | |  |
| intercept | -1.948 | 0.687 | -2.837 | 0.0001 |
| β1 (ga) | 0.237 | 0.044 | 5.361 | 0.0001 |
| β2 (ga)2 | -0.004 | 0.001 | -5.022 | 0.0001 |
|  |  |  |  |  |
|  |  | **90th centile** | |  |
| intercept | -4.804 | 0.404 | -11.880 | 0.0001 |
| β1 (ga) | 0.466 | 0.024 | 19.437 | 0.0001 |
| β2 (ga)2 | 0.007 | 0.001 | 20.736 | 0.0001 |
|  |  |  |  |  |
|  |  | **95th centile** | |  |
| intercept | -5.210 | 0.637 | -8.180 | 0.0001 |
| β1 (ga) | 0.495 | 0.041 | 12.023 | 0.0001 |
| β2 (ga)2 | -0.008 | 0.001 | -11.625 | 0.0001 |
